# Supplementary material for: Isolation and Characterization of Two Lytic Bacteriophages Infecting a Multi-Drug Resistant Salmonella Typhimurium and Their Efficacy to Combat Salmonellosis in Ready-to-Use Foods
Source: PubMed Central journal article supplement (PMC7922427; doi:10.3390/microorganisms9020423), 2021-02-18
Supplement: microorganisms-09-00423-s001.pdf [file microorganisms-09-00423-s001.pdf]

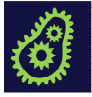

Supplementary Materials

# Isolation and characterization of two lytic bacteriophages infecting a multi-drug resistant *Salmonella* Typhimurium and their efficacy to combat salmonellosis in ready-to-use foods

Ahmed Esmael <sup>1,\*</sup>, Ehab Azab <sup>2</sup>, Adil A. Gobouri <sup>3</sup>, Mohamed A. Nasr-Eldin <sup>1</sup>, Mahmoud M.A. Moustafa <sup>4</sup>, Shereen A. Mohamed <sup>4</sup>, Omnia A. M. Badr <sup>4</sup> and Alzahraa M. Abdelatty <sup>5,\*</sup>

<sup>1</sup> Botany and Microbiology Department, Faculty of Science, Benha University, Qalubiya Governorate, 13511, Egypt; ahmed.esmael@fsc.bu.edu.eg (A.E.); nasreldeen.m@gmail.com (M.A.N.)

<sup>2</sup> Department of Nutrition and Food Science, College of Science, Taif University, P.O. Box 11099, Taif 21944, Saudia Arabia; e.azab@tu.edu.sa (E.A.)

<sup>3</sup> Department of Chemistry, College of Science, Taif University, P.O. Box 11099, Taif 21944, Saudia Arabia; a.gobouri@tu.edu.sa (A.A.G.)

<sup>4</sup> Department of Genetics and Genetic Engineering, Faculty of Agriculture, Benha University, Qalubiya Governorate, 13736, Egypt; mahmoud.mustafa@fagr.bu.edu.eg (M.M.A.M.); shereen.mustafa@fagr.bu.edu.eg (S.A.M.); omnia.badr@fagr.bu.edu.eg (O.A.M.B)

<sup>5</sup> Department of Nutrition and Clinical Nutrition, Faculty of Veterinary Medicine, Cairo University, Giza, Egypt; alzahraa@cu.edu.eg; raramehmet@gmail.com (A.M.A.)

\* Correspondence: ahmed.esmael@fsc.bu.edu.eg (A.E.), alzahraa@cu.edu.eg ; raramehmet@gmail.com (A.M.A.)

**Table S1.** Bacterial strains used in current study.

21

| Species               | Strain ID number                 | Source             |
|-----------------------|----------------------------------|--------------------|
| <b>S. Typhimurium</b> | EG.SmT1                          | AE <sup>1</sup>    |
|                       | EG.SmT2                          | AE                 |
|                       | EG.SmT3 (phages enrichment host) | AE                 |
|                       | 101SM                            | FSCBU <sup>2</sup> |
| <b>S. Enteritidis</b> | EG.SmE1                          | A.E.               |
|                       | EG.SmE2                          | A.E.               |
|                       | EG.SE1                           | FSCBU              |
|                       | 331SM                            | FSCBU              |
| <b>S. Kentucky</b>    | 7                                | FSCBU              |
|                       | 12                               | FSCBU              |
|                       | 51                               | FSCBU              |
| <b>S. Typhi</b>       | SamTph1                          | FSCBU              |
|                       | SamTph2                          | FSCBU              |
|                       | SamTph5                          | FSCBU              |
| <b>S. para Typhi</b>  | 102                              | FSCBU              |
| <b>E. coli</b>        | BE1                              | FSCBU              |
|                       | BE2                              | FSCBU              |
|                       | BE3                              | FSCBU              |
| <b>S. aureus</b>      | SA101                            | FSCBU              |
|                       | SA1E                             | FSCBU              |
|                       | EG-AE1                           | FSCBU              |
| <b>Number (N=21)</b>  |                                  |                    |

<sup>1</sup> AE (From poultry farm with a history of diarrhea).

22

<sup>2</sup> FSCBU (Microbiology lab, Botany and Microbiology Dept., Faculty of Science, Benha Univ.).

23

24

**Table S2.** BLASTn alignment of homologs phage sequences (at the GenBank database) with Salmonella phage SPHG125  
26

| Phage                        | Phage Family      | Isolated place | Accession#  | Length (bp) | E value | Query coverage |
|------------------------------|-------------------|----------------|-------------|-------------|---------|----------------|
| Salmonella phage vB_SenM-1   | <i>Myoviridae</i> | Poland         | MT012730.1  | 52471       | 0.0     | 97%            |
| Salmonella phage SE13        | <i>Myoviridae</i> | Canada         | NC_048763.1 | 52438       | 0.0     | 94%            |
| Salmonella phage brorfarstad | <i>Myoviridae</i> | Denmark        | MT074435.1  | 52392       | 0.0     | 95%            |
| Salmonella phage LSE7621     | <i>Myoviridae</i> | China          | MK568062.1  | 50936       | 0.0     | 88%            |
| Salmonella phage BP63        | <i>Myoviridae</i> | USA            | KM366099.1  | 52437       | 0.0     | 90%            |

27

**Table S3.** Genome annotation of SPHG1 genome

28

| CDS      | Gene Position  | Direction | Putative Function       |
|----------|----------------|-----------|-------------------------|
| SPHG1_01 | 1- 861         | Fwr.      | Thymidylate synthase    |
| SPHG1_02 | 894- 1139      | Rev.      | Hypothetical protein    |
| SPHG1_03 | 1170- 1589     | Rev.      | Hypothetical protein    |
| SPHG1_04 | 1620- 4112     | Rev.      | DNA primase/ helicase   |
| SPHG1_05 | 4128- 4772     | Fwr.      | Hypothetical protein    |
| SPHG1_06 | 5043- 6665     | Rev.      | superfamily II helicase |
| SPHG1_07 | 6742- 7584     | Rev.      | ATP-binding protein     |
| SPHG1_08 | 7601- 7849     | Rev.      | Hypothetical protein    |
| SPHG1_09 | 7973- 8389     | Rev.      | Hypothetical protein    |
| SPHG1_10 | 8438- 9340     | Rev.      | Hypothetical protein    |
| SPHG1_11 | 9455- 9745     | Rev.      | Hypothetical protein    |
| SPHG1_12 | 9790- 10,338   | Fwr.      | Hypothetical protein    |
| SPHG1_13 | 10,521- 11,018 | Fwr.      | Hypothetical protein    |
| SPHG1_14 | 11,015- 11,356 | Fwr.      | Hypothetical protein    |
| SPHG1_15 | 11,429- 11,878 | Fwr.      | Hypothetical protein    |
| SPHG1_16 | 11,923- 12,234 | Fwr.      | Hypothetical protein    |
| SPHG1_17 | 12,467- 12,748 | Rev.      | Hypothetical protein    |
| SPHG1_18 | 12,770- 13,165 | Rev.      | Hypothetical protein    |
| SPHG1_19 | 13,232- 13,351 | Rev.      | Hypothetical protein    |
| SPHG1_20 | 13,376- 13,570 | Rev.      | Hypothetical protein    |
| SPHG1_21 | 13,598- 13,723 | Rev.      | Hypothetical protein    |
| SPHG1_22 | 13,760- 13,885 | Fwr.      | Hypothetical protein    |
| SPHG1_23 | 13,907- 14,323 | Rev.      | Hypothetical protein    |
| SPHG1_24 | 14,392- 14,613 | Rev.      | Hypothetical protein    |
| SPHG1_25 | 15,099- 15,395 | Rev.      | Hypothetical protein    |
| SPHG1_26 | 15,491- 15,646 | Rev.      | Hypothetical protein    |
| SPHG1_27 | 16,220- 16,357 | Fwr.      | Hypothetical protein    |
| SPHG1_28 | 16,342- 16,461 | Fwr.      | Hypothetical protein    |

|          |                |      |                                    |
|----------|----------------|------|------------------------------------|
| SPHG1_29 | 16,504- 16,986 | Fwr. | Hypothetical protein               |
| SPHG1_30 | 17,028- 17,690 | Fwr. | dihydrofolate reductase            |
| SPHG1_31 | 17,687- 18,217 | Fwr. | guanylate kinase                   |
| SPHG1_32 | 18,214- 18,960 | Fwr. | Hypothetical protein               |
| SPHG1_33 | 18,960- 19,274 | Fwr. | Hypothetical protein               |
| SPHG1_34 | 19,372- 20,865 | Fwr. | terminase large subunit            |
| SPHG1_35 | 20,888- 21,178 | Rev. | Hypothetical protein               |
| SPHG1_36 | 21,240- 22,832 | Fwr. | portal protein                     |
| SPHG1_37 | 22,850- 23,635 | Rev. | Major capsid protein               |
| SPHG1_38 | 23,678- 24,382 | Rev. | Scaffold protein                   |
| SPHG1_39 | 24,413- 24,895 | Rev. | Hypothetical protein               |
| SPHG1_40 | 24,819- 25,196 | Rev. | Hypothetical protein               |
| SPHG1_41 | 25,196- 25,684 | Rev. | Hypothetical protein               |
| SPHG1_42 | 25,684- 26,124 | Rev. | Hypothetical protein               |
| SPHG1_43 | 26,049- 26,987 | Rev. | Major capsid protein               |
| SPHG1_44 | 27,129- 27,803 | Fwr. | Putative tail fibers protein       |
| SPHG1_45 | 27,804- 30,767 | Fwr. | Tail formation protein             |
| SPHG1_46 | 30,768- 31,115 | Rev. | Hypothetical protein               |
| SPHG1_47 | 31,127- 33,031 | Fwr. | major tail protein                 |
| SPHG1_48 | 33,124- 33,909 | Fwr. | Hypothetical protein               |
| SPHG1_49 | 33,978- 35,657 | Fwr. | Tail tape measure protein          |
| SPHG1_50 | 35,681- 36,541 | Fwr. | Hypothetical protein               |
| SPHG1_51 | 36,562- 37,209 | Fwr. | Translation initiation factor IF-2 |
| SPHG1_52 | 37,219- 38,178 | Fwr. | Hypothetical protein               |
| SPHG1_53 | 38,179- 38,523 | Fwr. | Hypothetical protein               |
| SPHG1_54 | 38,523- 39,674 | Fwr. | Hypothetical protein               |
| SPHG1_55 | 39,675- 41,060 | Fwr. | tail fiber protein                 |
| SPHG1_56 | 41,077- 41,652 | Fwr. | Putative tail fibers protein       |
| SPHG1_57 | 41,662- 42,144 | Fwr. | Putative tail fibers protein       |
| SPHG1_58 | 42,224- 42,847 | Fwr. | Cof hydrolase                      |
| SPHG1_59 | 42,875- 43,141 | Rev. | Hypothetical protein               |
| SPHG1_60 | 43,162- 43,668 | Fwr. | Lysin                              |
| SPHG1_61 | 43,669- 44,628 | Rev. | Hypothetical protein               |
| SPHG1_62 | 44,658- 46,616 | Fwr. | DNA polymerase I                   |

29

30

31

32

33

34

35

**Table S4.** BLASTn alignment of homologs phage sequences (at the GenBank database) with SPHG3

36

| Phage                         | Phage Family            | Isolated place | Accession#  | Length (bp) | E value | Query coverage |
|-------------------------------|-------------------------|----------------|-------------|-------------|---------|----------------|
| Salmonella phage ST-W77       | <i>Ackermannviridae</i> | Thailand       | NC_049378.1 | 157458      | 0.0     | 99%            |
| Salmonella phage Se_AO1       | <i>Ackermannviridae</i> | Spain          | LR800396.1  | 157543      | 0.0     | 91%            |
| Salmonella phage vB_SalM_PM10 | <i>Ackermannviridae</i> | India          | NC_031128.1 | 158081      | 0.0     | 91%            |
| Salmonella phage chennai      | <i>Ackermannviridae</i> | India          | MN953776.1  | 157462      | 0.0     | 91%            |
| Salmonella phage kage         | <i>Ackermannviridae</i> | Denmark        | MT074476.1  | 157658      | 0.0     | 92%            |

37

**Table S5.** Genome annotation of the SPHG3 genome

38

| CDS      | Gene Position | Direction | Putative Function                                 |
|----------|---------------|-----------|---------------------------------------------------|
| SPHG3_01 | 14-763        | Rev.      | Hypothetical protein                              |
| SPHG3_02 | 763-1221      | Rev.      | Putative DNA repair/recombination protein         |
| SPHG3_03 | 1260-1757     | Rev.      | Tail completion protein                           |
| SPHG3_04 | 2442-3173     | Rev.      | Hypothetical protein                              |
| SPHG3_05 | 3410-3832     | Rev.      | Hypothetical protein                              |
| SPHG3_06 | 4224-4688     | Rev.      | Hypothetical protein                              |
| SPHG3_07 | 4792-5046     | Rev.      | Hypothetical protein                              |
| SPHG3_08 | 5779-6228     | Rev.      | Hypothetical protein                              |
| SPHG3_09 | 6437-6673     | Rev.      | Hypothetical protein                              |
| SPHG3_10 | 6773-8095     | Rev.      | Major head protein                                |
| SPHG3_11 | 8187-9026     | Rev.      | Prohead assembly (scaffolding) protein            |
| SPHG3_12 | 9073-9741     | Rev.      | prohead core and protease                         |
| SPHG3_13 | 9749-10,066   | Rev.      | Hypothetical protein                              |
| SPHG3_14 | 10,287-11,969 | Rev.      | Portal vertex protein of head                     |
| SPHG3_15 | 12,037-12,570 | Rev.      | Phage tail tube monomer                           |
| SPHG3_16 | 12,601-13,059 | Rev.      | Hypothetical protein                              |
| SPHG3_17 | 13,118-13,438 | Rev.      | Tail sheath protein                               |
| SPHG3_18 | 13,486-15,012 | Rev.      | Tail sheath protein                               |
| SPHG3_19 | 15,065-17,275 | Rev.      | Terminase DNA packaging enzyme large subunit      |
| SPHG3_20 | 17,504-17,935 | Rev.      | Gp16 terminase DNA packaging enzyme small subunit |
| SPHG3_21 | 17,938-18,636 | Rev.      | Proximal tail sheath stabilization protein        |
| SPHG3_22 | 18,639-19,280 | Rev.      | Phage neck protein                                |
| SPHG3_23 | 19,583-20,392 | Rev.      | Phage Neck protein                                |
| SPHG3_24 | 20,322-20,663 | Rev.      | Hypothetical protein                              |
| SPHG3_25 | 20,647-20,943 | Rev.      | Hypothetical protein                              |
| SPHG3_26 | 21,052-22,446 | Rev.      | Hypothetical protein                              |
| SPHG3_27 | 22,374-23,585 | Rev.      | Tail fibers protein                               |
| SPHG3_28 | 23,637-24,329 | Rev.      | Hypothetical protein                              |
| SPHG3_29 | 24,326-26,416 | Rev.      | Hypothetical protein                              |
| SPHG3_30 | 26,514-27,956 | Rev.      | Phage tail fibers                                 |
| SPHG3_31 | 28,433-28,639 | Rev.      | Phage tail fibers                                 |
| SPHG3_32 | 28,719-31,760 | Rev.      | Phage tail fibers                                 |
| SPHG3_33 | 31,807-32,997 | Rev.      | Hypothetical protein                              |

|          |               |      |                                                |
|----------|---------------|------|------------------------------------------------|
| SPHG3_34 | 33,000-33,881 | Rev. | Hypothetical protein                           |
| SPHG3_35 | 33,838-35,631 | Rev. | Baseplate wedge subunit                        |
| SPHG3_36 | 37,092-37,352 | Rev. | Hypothetical protein                           |
| SPHG3_37 | 37,887-38,135 | Rev. | Hypothetical protein                           |
| SPHG3_38 | 38,893-38,965 | Fwr. | tRNA-Met                                       |
| SPHG3_39 | 39,381-39,453 | Fwr. | tRNA-Asn                                       |
| SPHG3_40 | 40,213-40,296 | Fwr. | tRNA-Tyr                                       |
| SPHG3_41 | 40,376-40,461 | Fwr. | tRNA-Ser                                       |
| SPHG3_42 | 40,468-40,557 | Fwr. | tRNA-other                                     |
| SPHG3_43 | 40,558-40,782 | Rev. | Hypothetical protein                           |
| SPHG3_44 | 40,927-41,226 | Fwr. | Hypothetical protein                           |
| SPHG3_45 | 44,172-44,546 | Rev. | Hypothetical protein                           |
| SPHG3_46 | 44,543-45,100 | Rev. | Hypothetical protein                           |
| SPHG3_47 | 45,297-46,034 | Rev. | Hypothetical protein                           |
| SPHG3_48 | 46,204-46,794 | Rev. | Hypothetical protein                           |
| SPHG3_49 | 46,856-49,852 | Fwr. | DNA polymerase                                 |
| SPHG3_50 | 49,853-50,917 | Rev. | DNA Primase                                    |
| SPHG3_51 | 50,914-50,917 | Rev. | Hypothetical protein                           |
| SPHG3_52 | 50,914-51,372 | Rev. | N-acetylmuramoyl-L-alanine amidase (Autolysin) |
| SPHG3_53 | 51,685-52,188 | Rev. | Hypothetical protein                           |
| SPHG3_54 | 52,557-52,850 | Rev. | Hypothetical protein                           |
| SPHG3_55 | 52,861-53,478 | Rev. | Hypothetical protein                           |
| SPHG3_56 | 53,481-53,846 | Rev. | Hypothetical protein                           |
| SPHG3_57 | 53,850-56,183 | Rev. | Recombination-related endonuclease             |
| SPHG3_58 | 56,186-57,301 | Rev. | Recombination-related endonuclease             |
| SPHG3_59 | 57,288-58,079 | Rev. | Sigma factor involved in late transcription    |
| SPHG3_60 | 58,091-58,618 | Rev. | Ribonuclease H                                 |
| SPHG3_61 | 59,425-61,089 | Rev. | Probable ATP-dependent helicase                |
| SPHG3_62 | 61,282-61,560 | Rev. | DNA-binding protein                            |
| SPHG3_63 | 61,644-62,435 | Rev. | Hypothetical protein                           |
| SPHG3_64 | 62,641-62,961 | Rev. | Superinfection exclusion protein               |
| SPHG3_65 | 62,951-63,238 | Rev. | Hypothetical protein                           |
| SPHG3_66 | 63,240-63,908 | Rev. | Hypothetical protein                           |
| SPHG3_67 | 63,965-64,756 | Rev. | Hypothetical protein                           |
| SPHG3_68 | 64,806-65,126 | Rev. | Hypothetical protein                           |
| SPHG3_69 | 65,123-65,812 | Rev. | Hypothetical protein                           |
| SPHG3_70 | 66,379-66,657 | Rev. | Hypothetical protein                           |
| SPHG3_71 | 66,670-67,173 | Rev. | Endonuclease                                   |
| SPHG3_72 | 67,185-67,424 | Rev. | Hypothetical protein                           |
| SPHG3_73 | 67,556-67,873 | Rev. | Hypothetical protein                           |
| SPHG3_74 | 67,911-70,127 | Rev. | Hypothetical protein                           |
| SPHG3_75 | 70,292-70,651 | Rev. | Hypothetical protein                           |
| SPHG3_76 | 70,751-71,476 | Rev. | Hypothetical protein                           |
| SPHG3_77 | 71,469-71,720 | Rev. | Hypothetical protein                           |
| SPHG3_78 | 72,102-72,338 | Rev. | Hypothetical protein                           |
| SPHG3_79 | 72,398-72,769 | Rev. | Hypothetical protein                           |

|           |                 |      |                                                |
|-----------|-----------------|------|------------------------------------------------|
| SPHG3_80  | 72,808-74,823   | Rev. | Hypothetical protein                           |
| SPHG3_81  | 74,939-76,051   | Rev. | Hypothetical protein                           |
| SPHG3_82  | 76,228-77,181   | Rev. | Hypothetical protein                           |
| SPHG3_83  | 77,111-77,575   | Rev. | Translation repressor protein                  |
| SPHG3_84  | 77,605-78,027   | Rev. | DNA polymerase clamp loader subunit            |
| SPHG3_85  | 78,032-79,021   | Rev. | DNA polymerase clamp loader subunit            |
| SPHG3_86  | 79,100-79,768   | Rev. | Sliding clamp DNA polymerase accessory protein |
| SPHG3_87  | 80,479-81,978   | Rev. | DNA helicase                                   |
| SPHG3_88  | 82,039-82,383   | Fwr. | Hypothetical protein                           |
| SPHG3_89  | 82,376-83,158   | Fwr. | Hypothetical protein                           |
| SPHG3_90  | 83,474-84,379   | Fwr. | Hypothetical protein                           |
| SPHG3_91  | 84,921-86,162   | Fwr. | Hypothetical protein                           |
| SPHG3_92  | 86,311-91,154   | Fwr. | similar to virulence-associated VriC protein   |
| SPHG3_93  | 92,095-93,204   | Fwr. | Hypothetical protein                           |
| SPHG3_94  | 93,220-93,789   | Fwr. | Hypothetical protein                           |
| SPHG3_95  | 93,794-94,216   | Fwr. | Hypothetical protein                           |
| SPHG3_96  | 94,266-94,649   | Fwr. | Hypothetical protein                           |
| SPHG3_97  | 94,646-95,092   | Fwr. | Hypothetical protein                           |
| SPHG3_98  | 95,064-95,291   | Fwr. | Hypothetical protein                           |
| SPHG3_99  | 95,461-95,814   | Fwr. | Hypothetical protein                           |
| SPHG3_100 | 95,922-98,663   | Fwr. | rIIA lysis inhibitor                           |
| SPHG3_101 | 98,696-100,279  | Fwr. | rIIA lysis inhibitor                           |
| SPHG3_102 | 100,332-100,631 | Fwr. | Hypothetical protein                           |
| SPHG3_103 | 100,549-101,019 | Fwr. | Hypothetical protein                           |
| SPHG3_104 | 101,052-101,444 | Fwr. | Hypothetical protein                           |
| SPHG3_105 | 101,423-102,232 | Fwr. | Tail fiber                                     |
| SPHG3_106 | 102,506-103,048 | Fwr. | Hypothetical protein                           |
| SPHG3_107 | 103,329-103,814 | Fwr. | Hypothetical protein                           |
| SPHG3_108 | 103,811-104,389 | Fwr. | Hypothetical protein                           |
| SPHG3_109 | 104,439-106,352 | Fwr. | DNA topoisomerase                              |
| SPHG3_110 | 106,354-107,685 | Fwr. | DNA Topoisomerase                              |
| SPHG3_111 | 107,729-108,007 | Fwr. | Hypothetical protein                           |
| SPHG3_112 | 108,009-108,320 | Fwr. | Hypothetical protein                           |
| SPHG3_113 | 108,324-108,737 | Fwr. | Hypothetical protein                           |
| SPHG3_114 | 108,787-109,011 | Fwr. | Hypothetical protein                           |
| SPHG3_115 | 109,008-109,244 | Fwr. | Hypothetical protein                           |
| SPHG3_116 | 109,226-109,846 | Fwr. | Hypothetical protein                           |
| SPHG3_117 | 109,843-110,187 | Fwr. | Hypothetical protein                           |
| SPHG3_118 | 110,180-110,812 | Fwr. | Hypothetical protein                           |
| SPHG3_119 | 110,890-111,180 | Fwr. | Exonuclease A                                  |
| SPHG3_120 | 111,252-111,548 | Fwr. | Hypothetical protein                           |
| SPHG3_121 | 111,548-112,210 | Fwr. | Hypothetical protein                           |
| SPHG3_122 | 112,213-112,554 | Fwr. | Hypothetical protein                           |
| SPHG3_123 | 112,536-113,003 | Fwr. | Hypothetical protein                           |
| SPHG3_124 | 113,003-113,563 | Fwr. | putative serine/threonine protein phosphatase  |
| SPHG3_125 | 113,560-113,892 | Fwr. | Hypothetical protein                           |

|           |                 |      |                                                              |
|-----------|-----------------|------|--------------------------------------------------------------|
| SPHG3_126 | 113,889-114,239 | Fwr. | Hypothetical protein                                         |
| SPHG3_127 | 114,620-115,141 | Fwr. | dCMP deaminase                                               |
| SPHG3_128 | 115,143-115,550 | Fwr. | membrane-flanked domain protein                              |
| SPHG3_129 | 115,760-116,380 | Rev. | Head completion protein                                      |
| SPHG3_130 | 116,434-117,402 | Fwr. | Baseplate tail tube cap                                      |
| SPHG3_131 | 117,415-117,972 | Fwr. | Baseplate wedge component                                    |
| SPHG3_132 | 117,969-119,357 | Fwr. | Hypothetical protein                                         |
| SPHG3_133 | 119,368-121,308 | Fwr. | Hypothetical protein                                         |
| SPHG3_134 | 121,309-121,971 | Rev. | DNA helicase loader                                          |
| SPHG3_135 | 122,456-123,883 | Rev. | DNA Ligase                                                   |
| SPHG3_136 | 127,246-128,670 | Rev. | DNA primase/ helicase                                        |
| SPHG3_137 | 128,984-130,069 | Rev. | Recombination protein                                        |
| SPHG3_138 | 130,584-131,135 | Rev. | putative dUTP diphosphatase                                  |
| SPHG3_139 | 131,132-131,701 | Rev. | putative deoxynucleotide monophosphate kinase                |
| SPHG3_140 | 131,698-132,738 | Rev. | Thymidylate synthase                                         |
| SPHG3_141 | 135,719-136,423 | Rev. | DNA end protector during packaging                           |
| SPHG3_142 | 136,709-137,419 | Fwr. | Tail tube monomer                                            |
| SPHG3_143 | 137,566-138,477 | Rev. | Single stranded DNA-binding protein                          |
| SPHG3_144 | 138,823-139,125 | Rev. | Late promoter transcription accessory protein                |
| SPHG3_145 | 139,126-139,479 | Fwr. | Hypothetical protein                                         |
| SPHG3_146 | 139,495-139,770 | Rev. | Hypothetical protein                                         |
| SPHG3_147 | 139,875-140,513 | Rev. | Hypothetical protein                                         |
| SPHG3_148 | 140,513-141,130 | Rev. | Hypothetical protein                                         |
| SPHG3_149 | 141,492-141,821 | Rev. | Hypothetical protein                                         |
| SPHG3_150 | 141,822-143,447 | Fwr. | Cell wall-associated hydrolases                              |
| SPHG3_151 | 143,512-143,892 | Fwr. | Baseplate wedge subunit                                      |
| SPHG3_152 | 145,270-146,373 | Rev. | ribonucleotide reductase of class Ia (aerobic) beta subunit  |
| SPHG3_153 | 146,444-148,771 | Rev. | ribonucleotide reductase of class Ia (aerobic) alpha subunit |
| SPHG3_154 | 148,892-149,011 | Fwr. | peptidoglycan hydrolase                                      |
